# Supplementary material for: Genomic Characterization and Phylogenetic Analysis of SARS-CoV-2 in Asia
Source: Preprints.org preprint supplement (doi:10.20944/preprints202005.0100.v1), 2020-05-06
Supplement: Supplementary file 4 [file Suplementary table_2.xls]

## Sheet: Sheet1
Genome	Gene	Protein	Mutation	Accession number	country/region
Change		change
241C>T	5’UTR		Non-coding	EPI_ISL_420544 EPI_ISL_420546 EPI_ISL_420552 EPI_ISL_420551	India
				EPI_ISL_420549 EPI_ISL_420543 EPI_ISL_420545 EPI_ISL_420550
				EPI_ISL_420547 EPI_ISL_420555 EPI_ISL_420556 EPI_ISL_420554
				EPI_ISL_419298 EPI_ISL_419310 EPI_ISL_419302 EPI_ISL_419305	Japan
				EPI_ISL_419308
				EPI_ISL_417420 EPI_ISL_421222	China(NanChang-Hangzhou)
				EPI_ISL_416431 EPI_ISL_416428 EPI_ISL_416430	Vietnam
				EPI_ISL_420085 EPI_ISL_420084 EPI_ISL_420083 EPI_ISL_420082	Taiwan
				EPI_ISL_416521 EPI_ISL_416522	Saudi Arabia
				EPI_ISL_415642 EPI_ISL_420140 EPI_ISL_416478 EPI_ISL_416479	Georgia
				EPI_ISL_416482 EPI_ISL_420144 Ge416481
				EPI_ISL_417444	Pakistan
254C>T			Non-coding	EPI_ISL_416570	Japan
285G>T	orf1ab	G7V	Missense	EPI_ISL_416366	China(Shanghai)
313C>T			Synonymous	EPI_ISL_420555 EPI_ISL_420556	India
398C>T		H45Y	Missense	EPI_ISL_416829	Malaysia
845G>T		D194Y	Missense	EPI_ISL_421251	China(Jiangxi)
884C>T		R207C	Missense	EPI_ISL_416458 EPI_ISL_416541	Kuwait
				EPI_ISL_417444	Pakistan
915A>G		E217G	Missense	EPI_ISL_415641 EPI_ISL_415643 EPI_ISL_416480	Georgia
1059C>T		T265I	Missense	EPI_ISL_421222 EPI_ISL_417420	China(NanChang-Hangzhou)
				EPI_ISL_416478 EPI_ISL_420140	Georgia
				EPI_ISL_420085 EPI_ISL_417520 EPI_ISL_417521	Taiwan
1348C>T			Synonymous	EPI_ISL_417444	Pakistan
1385C>T		H374Y	Missense	EPI_ISL_416478	Georgia
1397G>A		V378I	Missense	EPI_ISL_416407 EPI_ISL_416332 EPI_ISL_416373 EPI_ISL_421262	China(Shanghai-Jiangxi)
				EPI_ISL_416541 EPI_ISL_416458	Kuwait
				EPI_ISL_417520 EPI_ISL_417521	Taiwan
				EPI_ISL_417444	Pakistan
				EPI_ISL_420142	Georgia
1430A>G		N389D	Missense	EPI_ISL_414692	China(Guangdong)
1595G>A		E444K	Missense	EPI_ISL_414519	Hong Kong
1691A>G		I476V	Missense	EPI_ISL_413523	India
1740A>C		K492T	Missense	EPI_ISL_412869	South Korea
1779C>T		S505F	Missense	EPI_ISL_412871	South Korea
1805G>A		G514R	Missense	EPI_ISL_416373	China(Shanghai)
1912C>T				EPI_ISL_421251	China(Jiangxi)
2239A>C		E658D	Missense	EPI_ISL_416541	Kuwait
2416C>T				EPI_ISL_420084	Taiwan
2707A>G				EPI_ISL_413018	South Korea
2971G>T		M902I	Missense	EPI_ISL_411929	South Korea
3025G>T		M920I	Missense	EPI_ISL_419308	Japan
3037C>T			Synonymous	EPI_ISL_420544 EPI_ISL_420546 EPI_ISL_420552 EPI_ISL_420551	India
				EPI_ISL_420549 EPI_ISL_420543 EPI_ISL_420545 EPI_ISL_420550
				EPI_ISL_420547 EPI_ISL_420555 EPI_ISL_420556 EPI_ISL_420554
				EPI_ISL_419298 EPI_ISL_419310 EPI_ISL_419302 EPI_ISL_419305	Japan
				EPI_ISL_419308
				EPI_ISL_416431 EPI_ISL_416428 EPI_ISL_416430	Vietnam
				EPI_ISL_420085 EPI_ISL_420084 EPI_ISL_420083 EPI_ISL_420082	Taiwan
				EPI_ISL_416521 EPI_ISL_416522	Saudi Arabia
				EPI_ISL_415642 EPI_ISL_420140 EPI_ISL_416478 EPI_ISL_416479	Georgia
				EPI_ISL_416482 EPI_ISL_420144 EPI_ISL_416481
3086T>C		F941L	Missense	EPI_ISL_412873	South Korea
3132A>G		Q956R	Missense	EPI_ISL_416584	Japan
3171T>C		L969P	Missense	EPI_ISL_414940	China(Shandong)
3375A>C		N1037T	Missense	EPI_ISL_421251	China(Jiangxi)
3472A>G				EPI_ISL_416458	Kuwait
3768C>T		T1168I	Missense	EPI_ISL_411950	China(Jiangsu)
				EPI_ISL_416340 EPI_ISL_402123	China(Shanghai-Hubei)
3860G>A		V1199I	Missense	EPI_ISL_411952	China(Jiangsu)
4158C>T		A1298V	Missense	EPI_ISL_416622	Japan
4402T>C				EPI_ISL_413521 EPI_ISL_413519	China(Beijing)
				EPI_ISL_413514 EPI_ISL_413516 EPI_ISL_413513 EPI_ISL_407193	South Korea
				EPI_ISL_412871 EPI_ISL_412870
4809C>T		S1515F	Missense	EPI_ISL_420544 EPI_ISL_420546 EPI_ISL_420552 EPI_ISL_420551	India
				EPI_ISL_420548 EPI_ISL_420547 EPI_ISL_420554 EPI_ISL_420543
				EPI_ISL_420550 EPI_ISL_420549 EPI_ISL_420545
5062G>T		L1599F	Missense	EPI_ISL_413521 EPI_ISL_413519	China(Beijing)
				EPI_ISL_413514 EPI_ISL_413516 EPI_ISL_413513 EPI_ISL_407193	South Korea
				EPI_ISL_412871 EPI_ISL_412870
5239C>T			Synonymous	EPI_ISL_416398	China(Shanghai)
5654C>T			Synonymous	EPI_ISL_420084	Taiwan
5869C>T			Synonymous	EPI_ISL_416407	China(Shanghai)
6031C>T			Synonymous	EPI_ISL_411929	South Korea
6255C>T		A1997V	Missense	EPI_ISL_412873
6312C>A		T2016K	Missense	EPI_ISL_416432	Saudi Arabia
6501C>T		P2079L	Missense	EPI_ISL_413523	India
7420C>T			Synonymous	EPI_ISL_411952	China(Jiangsu)
8388A>G		N2708S	Missense	EPI_ISL_402123	China(Hubei)
8566T>C			Synonymous	EPI_ISL_416478	Georgia
8653G>T		M2796I	Missense	EPI_ISL_416458 EPI_ISL_416541	Kuwait
8767T>C			Synonymous	EPI_ISL_412869	South Korea
8782C>T			Synonymous	EPI_ISL_420543 EPI_ISL_420545 EPI_ISL_413523	India
				EPI_ISL_416477	Georgia
				EPI_ISL_421246 EPI_ISL_421247 EPI_ISL_421248 EPI_ISL_421249	China(Jiangxi)
				EPI_ISL_421252 EPI_ISL_421253 EPI_ISL_421254 EPI_ISL_421255
				EPI_ISL_421251 EPI_ISL_421250 EPI_ISL_421256
				EPI_ISL_412870 EPI_ISL_412871 EPI_ISL_412873 EPI_ISL_412869	South Korea
				EPI_ISL_413516 EPI_ISL_413513 EPI_ISL_407193 EPI_ISL_413514
				EPI_ISL_416429	Vietnam
8987T>A		F2908I	Missense	EPI_ISL_402123	China(Hubei)
9159C>T		P2965L	Missense	EPI_ISL_417444	Pakistan
9223C>T			Synonymous	EPI_ISL_416625	Japan
9259A>G			Synonymous	EPI_ISL_416429	Vietnam
9474C>T		A3070V	Missense	EPI_ISL_416578	Japan
9477T>A		F3071Y	Missense	EPI_ISL_416477	Georgia
9962C>T		H3233Y	Missense	EPI_ISL_414519	Hong Kong
10138C>T			Synonymous	EPI_ISL_410715 EPI_ISL_410716	Singapore
10232C>T		R3323C	Missense	EPI_ISL_418269	Vietnam
10319C>T		L3352F	Missense	EPI_ISL_415643	Georgia
10323A>G		K3353R	Missense	EPI_ISL_416332	China(Shanghai)
11074C>T			Synonymous	EPI_ISL_416332	China(Shanghai)
11083G>T		L3606F	Missense	EPI_ISL_416614 EPI_ISL_416634 EPI_ISL_416573 EPI_ISL_416572	Japan
				EPI_ISL_416600 EPI_ISL_416627 EPI_ISL_416590 EPI_ISL_416594
				EPI_ISL_416599 EPI_ISL_416625 EPI_ISL_416584 EPI_ISL_416622
				EPI_ISL_416575 EPI_ISL_416578 EPI_ISL_416632 EPI_ISL_416597
				EPI_ISL_415641 EPI_ISL_415643 EPI_ISL_420142 EPI_ISL_416480	Georgia
				EPI_ISL_421262 EPI_ISL_416366 EPI_ISL_421236 EPI_ISL_416407	China(Hangzhou-Jiangxi)
				EPI_ISL_416332 EPI_ISL_416373
				EPI_ISL_412873	South Korea
				EPI_ISL_417520 EPI_ISL_417521	Taiwan
				EPI_ISL_416432	Saudi Arabia
				EPI_ISL_417444	Pakistan
				EPI_ISL_416458 EPI_ISL_416541	Kuwait
				EPI_ISL_414571	Hong Kong
11410G>A			Synonymous	EPI_ISL_416599 EPI_ISL_416584	Japan
11704C>T			Synonymous	EPI_ISL_420890
11752C>T			Synonymous	EPI_ISL_420890
11916C>T		S3884L	Missense	EPI_ISL_417420	China(NanChang)
12115C>T			Synonymous	EPI_ISL_411929	South Korea
12896C>T		P4211S	Missense	EPI_ISL_421251	China(Jiangxi)
13183G>A			Synonymous	EPI_ISL_421238
13571G>T		G4436V	Missense	EPI_ISL_411952
13679A>G		Y4472C	Missense	EPI_ISL_410719	Singapore
13730C>T		A4489V	Missense	EPI_ISL_416432	South Korea
13929T>C			Synonymous	EPI_ISL_414569 EPI_ISL_414519	Hong Kong
14408C>T		P4715L	Missense	EPI_ISL_420544 EPI_ISL_420546 EPI_ISL_420552 EPI_ISL_420551	India
				EPI_ISL_420549 EPI_ISL_420543 EPI_ISL_420545 EPI_ISL_420550
				EPI_ISL_420547 EPI_ISL_420555 EPI_ISL_420556 EPI_ISL_420554
				EPI_ISL_419298 EPI_ISL_419310 EPI_ISL_419302 EPI_ISL_419305	Japan
				EPI_ISL_419308
				EPI_ISL_416431 EPI_ISL_416428 EPI_ISL_416430	Vietnam
				EPI_ISL_420085 EPI_ISL_420084 EPI_ISL_420083 EPI_ISL_420082	Taiwan
				EPI_ISL_416521 EPI_ISL_416522	Saudi Arabia
				EPI_ISL_415642 EPI_ISL_420140 EPI_ISL_416478 EPI_ISL_416479	Georgia
				EPI_ISL_416482 EPI_ISL_420144 EPI_ISL_416481
				EPI_ISL_417420	China(NanChang)
14724C>T			Synonymous	EPI_ISL_414519	Hong Kong
14805C>T			Synonymous	EPI_ISL_416477	Georgia
14925C>T			Synonymous	EPI_ISL_420142
15017C>T		A4918V	Missense	EPI_ISL_412871	South Korea
15324C>T			Synonymous	EPI_ISL_420083	Taiwan
15359G>A		R5032H	Missense	EPI_ISL_416477	Georgia
15597T>C			Synonymous	EPI_ISL_411929	South Korea
16188G>T		W5308C	Missense	EPI_ISL_406031	Taiwan
16474A>G		S5404G	Missense	EPI_ISL_416340	China(Shanghai)
16535G>T		S5424I	Missense	EPI_ISL_414692	China(Guangdong)
16877C>T		T5538I	Missense	EPI_ISL_413523	India
17002C>T		L5580F	Missense	EPI_ISL_408485	China(Beijing)
17104C>T		H5614Y	Missense	EPI_ISL_412869	South Korea
17122G>A		A5620T	Missense	EPI_ISL_412873	South Korea
17373C>T			Synonymous	EPI_ISL_411066 EPI_ISL_416398	China(Fujian-Shanghai)
				EPI_ISL_410719	Singapore
17502C>T			Synonymous	EPI_ISL_416407	China(Shanghai)
17679G>T			Synonymous	EPI_ISL_420140	Georgia
18060C>T			Synonymous	EPI_ISL_411060	China(Fujian)
18568C>T		L6102F	Missense	EPI_ISL_414692	China(Guangdong)
18656C>T		T6131I	Missense	EPI_ISL_416625	Japan
18877C>T			Synonymous	EPI_ISL_419298	Japan
				EPI_ISL_416522 EPI_ISL_416521	Saudi Arabia
18996T>C			Synonymous	EPI_ISL_412980	China(Hubei)
18998C>T		A6245V	Missense	EPI_ISL_417420	China(NanChang)
19518G>T		L6418F	Missense	EPI_ISL_416407	China(Shanghai)
19525G>A		D6421N	Missense	EPI_ISL_417420	China(NanChang)
19547C>T		S6428L	Missense	EPI_ISL_417520	Taiwan
20059A>T		S6599C	Missense	EPI_ISL_416541	Kuwait
20268A>G			Synonymous	EPI_ISL_416481	Georgia
20709G>T		M6815I	Missense	EPI_ISL_416614	Japan
20936C>T		T6891M	Missense	EPI_ISL_411929	South Korea
21142G>T		A6960S	Missense	EPI_ISL_416429	Vietnam
21282A>G			Synonymous	EPI_ISL_421236	China(Hangzhou)
21316G>A		D7018N	Missense	EPI_ISL_402127	China(Hubei)
21584T>G	S	L8V	Missense	EPI_ISL_414519	Hong Kong
21707C>T		H49Y	Missense	EPI_ISL_421257 EPI_ISL_411952	China(Jiangsu-Jiangxi)
21859C>T			Synonymous	EPI_ISL_410714	Singapore
22104G>T		G181V	Missense	EPI_ISL_416570	Japan
22224C>G		S221W	Missense	EPI_ISL_411929	South Korea
22404A>T		E281V	Missense	EPI_ISL_420083	Taiwan
22695A>G		K378R	Missense	EPI_ISL_416320	China(Shanghai)
22875C>T		S438F	Missense	EPI_ISL_420543 EPI_ISL_420547	India
23248C>T			Synonymous	EPI_ISL_419308	Japan
23403A>G		D614G	Missense	EPI_ISL_420544 EPI_ISL_420546 EPI_ISL_420552 EPI_ISL_420551	India
				EPI_ISL_420549 EPI_ISL_420543 EPI_ISL_420545 EPI_ISL_420550
				EPI_ISL_420547 EPI_ISL_420555 EPI_ISL_420556 EPI_ISL_420554
				EPI_ISL_419298 EPI_ISL_419310 EPI_ISL_419302 EPI_ISL_419305	Japan
				EPI_ISL_419308
				EPI_ISL_416431 EPI_ISL_416428 EPI_ISL_416430	Vietnam
				EPI_ISL_420085 EPI_ISL_420084 EPI_ISL_420083 EPI_ISL_420082	Taiwan
				EPI_ISL_416521 EPI_ISL_416522	Saudi Arabia
				EPI_ISL_415642 EPI_ISL_420140 EPI_ISL_416478 EPI_ISL_416479	Georgia
				EPI_ISL_416482 EPI_ISL_420144 Ge416481
23522G>C		E654Q	Missense	EPI_ISL_416480	Georgia
23679C>T		A706V	Missense	EPI_ISL_420085	Taiwan
23929C>T			Synonymous	EPI_ISL_416432	Saudi Arabia
23934C>T		T791I	Missense	EPI_ISL_417520 EPI_ISL_417521	Taiwan
23986T>C			Synonymous	EPI_ISL_416366	China(Shanghai)
24034C>T			Synonymous	EPI_ISL_416429	Vietnam
				EPI_ISL_410301	Nepal
				EPI_ISL_408485	China(Beijing)
24077G>T		D839Y	Missense	EPI_ISL_416482	Georgia
24140G>C		V860Q	Missense	EPI_ISL_408485	China(Beijing)
24141T>A		V860Q	Missense	EPI_ISL_408485
24142T>A		V860Q	Missense	EPI_ISL_408485
24143T>A		L861K	Missense	EPI_ISL_408485
24144T>A		L861K	Missense	EPI_ISL_408485
24325A>G			Synonymous	EPI_ISL_402127	China(Hubei)
24351C>T		A930V	Missense	EPI_ISL_413523	India
24370C>T			Synonymous	EPI_ISL_416320 EPI_ISL_412980	China(Shanghai-Hubei)
24471T>C		F970S	Missense	EPI_ISL_408485	China(Beijing)
24812G>T		D1084Y	Missense	EPI_ISL_421262	China(Jiangxi)
24862A>G			Synonymous	EPI_ISL_420082	Taiwan
25060A>G			Synonymous	EPI_ISL_406973	Singapore
25207C>T			Synonymous	EPI_ISL_416407	China(Shanghai)
25500G>A	ORF3a		Synonymous	EPI_ISL_414569	Hong Kong
25563G>T		Q57H	Missense	EPI_ISL_416478 EPI_ISL_420140	Georgia
				EPI_ISL_416521 EPI_ISL_416522	Saudi Arabia
				EPI_ISL_420085 EPI_ISL_420084	Taiwan
				EPI_ISL_419298	Japan
25615A>G		K75E	Missense	EPI_ISL_416432	Saudi Arabia
25652T>A		F87Y	Missense	EPI_ISL_408485	China(Beijing)
25654G>T		V88L	Missense	EPI_ISL_411902	Cambodia
25775G>T		W128L	Missense	EPI_ISL_411929	South Korea
25919C>T		T176I	Missense	EPI_ISL_411950	China(Jiangsu)
25947G>T		Q185H	Missense	EPI_ISL_416366	China(Shanghai)
25964A>G		E191G	Missense	EPI_ISL_406031	Taiwan
25979G>T		G196V	Missense	EPI_ISL_416477	Georgia
25980A>C			Synonymous	EPI_ISL_416541	Kuwait
26029C>A		Q213K	Missense	EPI_ISL_420142	Georgia
26058C>T			Synonymous	EPI_ISL_420142
26144G>T		G251V	Missense	EPI_ISL_410715 EPI_ISL_410713 EPI_ISL_410716 EPI_ISL_410714	Singapore
				EPI_ISL_406031	Taiwan
				EPI_ISL_415641 EPI_ISL_415643 EPI_ISL_416480	Georgia
				EPI_ISL_411929 EPI_ISL_413018	South Korea
				EPI_ISL_414569 EPI_ISL_414519	Hong Kong
26167G>T		V259L	Missense	EPI_ISL_412869	South Korea
26211G>T			Synonymous	EPI_ISL_411952	China(Jiangsu)
26354T>A	E	L37H	Missense	EPI_ISL_411929	South Korea
26640G>T	M	A40S	Missense	EPI_ISL_413018	South Korea
26642C>T			Synonymous	EPI_ISL_419308	Japan
26677T>C		I52T	Missense	EPI_ISL_413018	South Korea
26729T>C			Synonymous	EPI_ISL_416429	Vietnam
				EPI_ISL_408485	China(Beijing)
26735C>T			Synonymous	EPI_ISL_416522 EPI_ISL_416521	Saudi Arabia
26834G>T			Synonymous	EPI_ISL_408485	China(Beijing)
27131C>T			Synonymous	EPI_ISL_416829	Malaysia
27147G>C		D209H	Missense	EPI_ISL_416829
27554T>C	ORF7a		Synonymous	EPI_ISL_416320	China(Shanghai)
27613G>T		V74F	Missense	EPI_ISL_416458	Kuwait
27877G>T	ORF7b	C41F	Missense	EPI_ISL_420084	Taiwan
27985A>G	ORF8	Y31C	Missense	EPI_ISL_420142	Georgia
27986T>A			Nonsense	EPI_ISL_420142
27987G>A		Y32I	Missense	EPI_ISL_420142
28077G>C		V62L	Missense	EPI_ISL_408485	China(Beijing)
				EPI_ISL_416429	Vietnam
28144T>C		L84S	Missense	EPI_ISL_413523	India
				EPI_ISL_416477	Georgia
				EPI_ISL_421246 EPI_ISL_421247 EPI_ISL_421248 EPI_ISL_421249	China(Jiangxi)
				EPI_ISL_421250 EPI_ISL_421251 EPI_ISL_421256
				EPI_ISL_421252 EPI_ISL_421253 EPI_ISL_421254 EPI_ISL_421255
				EPI_ISL_412870 EPI_ISL_412871 EPI_ISL_412873 EPI_ISL_412869	South Korea
				EPI_ISL_413514 EPI_ISL_413516 EPI_ISL_413513 EPI_ISL_407193
				EPI_ISL_416429	Vietnam
28305A>C	N	N11T	Missense	EPI_ISL_421262	China(Jiangxi)
28311C>T		P13L	Missense	EPI_ISL_416432	Saudi Arabia
28648T>C			Synonymous	EPI_ISL_417520 EPI_ISL_417521	Taiwan
28657C>T			Synonymous	EPI_ISL_416477	Georgia
28688T>C			Synonymous	EPI_ISL_416407 EPI_ISL_416332 EPI_ISL_416373 EPI_ISL_421262	China(Shanghai-Jiangxi)
				EPI_ISL_416479 EPI_ISL_420142	Georgia
				EPI_ISL_416458 EPI_ISL_416541	Kuwait
				EPI_ISL_417520 EPI_ISL_417521	Taiwan
28830C>A		S186Y	Missense	EPI_ISL_416398	China(Shanghai)
28849C>T			Synonymous	EPI_ISL_410713	Singapore
28854C>T		S194L	Missense	EPI_ISL_421251	China(Jiangxi)
28857G>A		R195K	Missense	EPI_ISL_420085	Taiwan
28863C>T		S197L	Missense	EPI_ISL_416477	Georgia
28867T>C			Synonymous	EPI_ISL_421251	China(jiangxi)
28881G>A		R203K	Missense	EPI_ISL_420144	Georgia
				EPI_ISL_419305 EPI_ISL_419308 EPI_ISL_419310 EPI_ISL_419302	Japan
				EPI_ISL_420555 EPI_ISL_420556	India
				EPI_ISL_416430 EPI_ISL_416431 EPI_ISL_416428	Vietnam
28882G>A			Synonymous	EPI_ISL_420144	Georgia
				EPI_ISL_419305 EPI_ISL_419308 EPI_ISL_419310 EPI_ISL_419302	Japan
				EPI_ISL_420555 EPI_ISL_420556	India
				EPI_ISL_416430 EPI_ISL_416431 EPI_ISL_416428	Vietnam
28883G>C		G204R	Missense	EPI_ISL_420144	Georgia
				EPI_ISL_419305 EPI_ISL_419308 EPI_ISL_419310 EPI_ISL_419302	Japan
				EPI_ISL_420555 EPI_ISL_420556	India
				EPI_ISL_416430 EPI_ISL_416431 EPI_ISL_416428	Vietnam
29029T>C			Synonymous	EPI_ISL_412980	China(Hubei)
29095C>T			Synonymous	EPI_ISL_421238 EPI_ISL_416366	China(Shanghai-Jiangsu)
29140G>T		Q289H	Missense	EPI_ISL_420890	Japan
29366C>T		P365S	Missense	EPI_ISL_414571	Hong Kong
29540G>A			Non-coding	EPI_ISL_417420	China(NanChang)
29593G>A	ORF10		Synonymous	EPI_ISL_412869	South Korea
29635C>T			Synonymous	EPI_ISL_416625	Japan
29670C>T		T38I	Missense	EPI_ISL_416373	China(Shanghai)
29732C>T	3’UTR		Non-coding	EPI_ISL_411950	China(Jiangsu)
29736G>T			Non-coding	EPI_ISL_416570	Japan
29742G>T			Non-coding	EPI_ISL_416407 EPI_ISL_416332 EPI_ISL_416373 EPI_ISL_421262	China(Shanghai-Jiangxi)
				EPI_ISL_416458 EPI_ISL_416541	Kuwait
				EPI_ISL_417520 EPI_ISL_417521	Taiwan
				EPI_ISL_420142	Georgia
29751G>C			Non-coding	EPI_ISL_416570	Japan
29755G>A			Non-coding	EPI_ISL_411066	China(Fujian)
